# Supplementary material
Source: PubMed Central journal article supplement (PMC5676544)
Supplement: supplementary_material_501.pdf [file supplementary_material_501.pdf]

**Supplementary material:** Variable selection from all predictive factors analysed.

| Variables in full model            | OR    | SE(logOR) | Pr(> t ) | 95% CI       |
|------------------------------------|-------|-----------|----------|--------------|
| (Intercept)                        | 2.746 | 1.64      | 0.54     | 0.110-68.333 |
| Sex                                | 0.852 | 0.34      | 0.65     | 0.438-1.659  |
| Age at study                       | 0.980 | 0.02      | 0.35     | 0.943-1.019  |
| Hx of cardiovascular disease (Y/N) | 0.625 | 0.6       | 0.43     | 0.193-2.026  |
| Hx of renal disease (Y/N)          | 3.158 | 1.55      | 0.46     | 0.151-65.891 |
| Hx of GI disease (Y/N)             | 1.699 | 0.47      | 0.26     | 0.676-4.268  |
| Weight loss (Y/N)                  | 3.743 | 0.59      | 0.03     | 1.178-11.898 |
| Family Hx of GI malignancy (Y/N)   | 0.726 | 0.55      | 0.56     | 0.247-2.134  |
| Other malignancy (Y/N)             | 1.221 | 1.19      | 0.87     | 0.119-12.584 |
| Initial Hb                         | 0.844 | 0.16      | 0.31     | 0.617-1.154  |
| Initial MCV                        | 0.961 | 0.02      | 0.05     | 0.924-0.999  |
| Initial ferritin                   | 1.010 | 0.01      | 0.23     | 0.990-1.030  |
| Lowest Hb                          | 1.336 | 0.19      | 0.15     | 0.921-1.939  |
| Antiplatelet use                   | 5.207 | 0.94      | 0.08     | 0.825-32.865 |
| NSAID use                          | 3.456 | 1.07      | 0.25     | 0.424-28.140 |
| Coeliac serology (Y/N)             | 1.935 | 0.54      | 0.22     | 0.671-5.576  |

Abbreviations: CI confidence interval, GI gastrointestinal, Hb haemoglobin, Hx history, MCV mean corpuscular volume, NSAID non-steroidal anti-inflammatory drug, OR odds ratio, SE standard error  
Values highlighted in red were considered significant enough to be included in the final model of predictive factors.
